# Supplementary material for: Supporting sexuality for people living with epidermolysis bullosa: clinical practice guidelines
Source: PubMed Central journal article supplement (PMC7789698; doi:10.1186/s13023-020-01640-0), 2021-01-06
Supplement: 13023_2020_1640_MOESM3_ESM.pdf [file 13023_2020_1640_MOESM3_ESM.pdf]

## EB Sexuality Clinical Practice Guideline: Supplementary material 3

### Panel member's affiliations and roles, Review panel affiliations

| CPG working Panel                                                                                                                                                                                                                                                                                                                                                                   |                   |                                                                           |               |                               |               |          |                                |                   |                           |                           |         |              |                                      |                                          |                    |
|-------------------------------------------------------------------------------------------------------------------------------------------------------------------------------------------------------------------------------------------------------------------------------------------------------------------------------------------------------------------------------------|-------------------|---------------------------------------------------------------------------|---------------|-------------------------------|---------------|----------|--------------------------------|-------------------|---------------------------|---------------------------|---------|--------------|--------------------------------------|------------------------------------------|--------------------|
| Panel member                                                                                                                                                                                                                                                                                                                                                                        | Country of origin | Speciality with EB                                                        | Role in panel | Method and appraisal training | First meeting | Searches | Paper filtration and Appraisal | Outcome summaries | Recommendation on meeting | Recommendation on Summary | Writing | Panel Review | Incorporation of feedback from panel | Incorporation of feedback from reviewers | Submitting the CPG |
| Alex Ryan King                                                                                                                                                                                                                                                                                                                                                                      | USA               | Occupational Therapist lead of EB service for Paediatrics to young adults | Lead          | ✓                             | ✓             | ✓        | ✓                              | ✓                 | ✓                         | ✓                         | ✓       | ✓            | ✓                                    | ✓                                        | ✓                  |
| Humphrey Hanley                                                                                                                                                                                                                                                                                                                                                                     | New Zealand       | PPI/ RDEB/ DEBRA New Zealand                                              | Co-lead       |                               |               |          | ✓                              | ✓                 | ✓                         | ✓                         | ✓       | ✓            | ✓                                    | ✓                                        | ✓                  |
| Mark Popenhagen                                                                                                                                                                                                                                                                                                                                                                     | USA               | Psychologist Specializing in EB and Pain/ and Guideline methodologist     | Member        |                               |               | ✓        | ✓                              | ✓                 | ✓                         | ✓                         |         | ✓            | ✓                                    | ✓                                        |                    |
| Florencia Perez                                                                                                                                                                                                                                                                                                                                                                     | Chile             | Community Psychologist                                                    | Member        |                               | ✓             | ✓        | ✓                              | ✓                 | ✓                         | ✓                         |         | ✓            |                                      | ✓                                        |                    |
| Kerry Thompson                                                                                                                                                                                                                                                                                                                                                                      | Australia         | PPI/ DDEB/ A&E nurse specialist                                           | Member        |                               | ✓             | ✓        | ✓                              | ✓                 | ✓                         | ✓                         |         | ✓            |                                      | ✓                                        |                    |
| Diana Purvis                                                                                                                                                                                                                                                                                                                                                                        | New Zealand       | Paediatric and Adolescent Dermatologist/ reported Col                     | Member        |                               |               | ✓        | ✓                              | ✓                 |                           |                           |         | ✓            | *                                    | *                                        |                    |
| Nora Garcia Garcia                                                                                                                                                                                                                                                                                                                                                                  | Spain             | Community Psychologist                                                    | Member        |                               | ✓             |          |                                |                   |                           |                           |         | ✓            |                                      |                                          |                    |
| Ida Steinlein                                                                                                                                                                                                                                                                                                                                                                       | Norway            | PPI/IRDEB/ DEBRA Norway                                                   | Member        |                               | ✓             |          |                                |                   |                           |                           |         | ✓            |                                      |                                          |                    |
| Mia Werkentoft                                                                                                                                                                                                                                                                                                                                                                      | Sweden            | PPI/JEB/ DEBRA Sweden                                                     | Member        |                               | ✓             |          |                                |                   |                           |                           |         | ✓            |                                      |                                          |                    |
| Matthew Lightfoot                                                                                                                                                                                                                                                                                                                                                                   | UK                | PPI/ DDEB/ DEBRA UK                                                       | Member        |                               |               |          |                                |                   | ✓                         | ✓                         |         | ✓            |                                      | ✓                                        |                    |
| Michelle Lahat                                                                                                                                                                                                                                                                                                                                                                      | USA               | Clinical Social Worker II                                                 | Member        |                               |               | ✓        | ✓                              | ✓                 | ✓                         | ✓                         |         | ✓            |                                      | ✓                                        |                    |
| Kalsoom Begum                                                                                                                                                                                                                                                                                                                                                                       | UK                | Adult CNS                                                                 | Member        |                               |               |          | ✓                              | ✓                 |                           |                           |         | ✓            |                                      |                                          |                    |
| Julio Tanabe                                                                                                                                                                                                                                                                                                                                                                        | USA               | PPI/ RDEB                                                                 | Member        |                               |               | ✓        |                                |                   | ✓                         | ✓                         |         |              |                                      |                                          |                    |
| <b>Key:</b> UK- United Kingdom; USA- United States of America; EB- Epidermolysis bullosa; CNS- EB Clinical Nurse Specialist; DI- DEBRA International; PPI- Patient and Public involved (People living with EB); Col- Conflict of interest; ✓- involved in this development step; * - not involved in this development step due to Col.                                              |                   |                                                                           |               |                               |               |          |                                |                   |                           |                           |         |              |                                      |                                          |                    |
| <b>Reviewer Panel List</b>                                                                                                                                                                                                                                                                                                                                                          |                   |                                                                           |               |                               |               |          |                                |                   |                           |                           |         |              |                                      |                                          |                    |
| Angela Roberts                                                                                                                                                                                                                                                                                                                                                                      | South Africa      | PPI                                                                       |               |                               |               |          |                                |                   |                           |                           |         |              |                                      |                                          |                    |
| Anna Carolina Rocha                                                                                                                                                                                                                                                                                                                                                                 | Brazil            | PPI                                                                       |               |                               |               |          |                                |                   |                           |                           |         |              |                                      |                                          |                    |
| Caroline Francis                                                                                                                                                                                                                                                                                                                                                                    | UK                | PPI                                                                       |               |                               |               |          |                                |                   |                           |                           |         |              |                                      |                                          |                    |
| Catherine Hayes                                                                                                                                                                                                                                                                                                                                                                     | UK                | Professor and Reader in Health Professions Pedagogic                      |               |                               |               |          |                                |                   |                           |                           |         |              |                                      |                                          |                    |
| Catherine McCuaig                                                                                                                                                                                                                                                                                                                                                                   | Canada            | Professor of Dermatology in Pediatrics                                    |               |                               |               |          |                                |                   |                           |                           |         |              |                                      |                                          |                    |
| Emma King                                                                                                                                                                                                                                                                                                                                                                           | Australia         | EB Nurse Practitioner                                                     |               |                               |               |          |                                |                   |                           |                           |         |              |                                      |                                          |                    |
| Maria Florencia Fernandez                                                                                                                                                                                                                                                                                                                                                           | Argentina         | Paediatric Dermatologist                                                  |               |                               |               |          |                                |                   |                           |                           |         |              |                                      |                                          |                    |
| Natalie Yerlett                                                                                                                                                                                                                                                                                                                                                                     | UK                | Specialist EB Paediatric Dietitian                                        |               |                               |               |          |                                |                   |                           |                           |         |              |                                      |                                          |                    |
| Sarah Morrill                                                                                                                                                                                                                                                                                                                                                                       | USA               | PPI                                                                       |               |                               |               |          |                                |                   |                           |                           |         |              |                                      |                                          |                    |
| Sofia Larrain Moore                                                                                                                                                                                                                                                                                                                                                                 | Chile             | Physiotherapist                                                           |               |                               |               |          |                                |                   |                           |                           |         |              |                                      |                                          |                    |
| Tracey Vlahovic                                                                                                                                                                                                                                                                                                                                                                     | USA               | Clinical Professor Department of Podiatric Medicine                       |               |                               |               |          |                                |                   |                           |                           |         |              |                                      |                                          |                    |
| Yitka Graham                                                                                                                                                                                                                                                                                                                                                                        | UK                | Head of Helen McCargle Nursing Research and Care                          |               |                               |               |          |                                |                   |                           |                           |         |              |                                      |                                          |                    |
| Zena Moore                                                                                                                                                                                                                                                                                                                                                                          | Ireland           | Professor and Head of the School of Nursing and                           |               |                               |               |          |                                |                   |                           |                           |         |              |                                      |                                          |                    |
| <b>Key:</b> UK- United Kingdom; EB- Epidermolysis bullosa; CNS- EB Clinical Nurse Specialist; GOSH- Great Ormond Street Hospital; RCSI- Royal College of Surgeons in Ireland; Col- Conflict of interest;- ✓ Expert presenter at the First panel meeting; * Panel members who has to resign their roles due to work commitments and requested to support through the review process. |                   |                                                                           |               |                               |               |          |                                |                   |                           |                           |         |              |                                      |                                          |                    |
